# Supplementary material for: Maintenance of the bladder cancer precursor urothelial hyperplasia requires FOXA1 and persistent expression of oncogenic HRAS
Source: PubMed Central journal article supplement (PMC6342925; doi:10.1038/s41598-018-36720-6), 2019-01-22

## Maintenance of the bladder cancer precursor urothelial hyperplasia requires FOXA1 and persistent expression of oncogenic *HRAS*

Christopher H. Yee<sup>1,†</sup>, Zongyu Zheng<sup>1,†</sup>, Lauren Shuman<sup>1</sup>, Hironobu Yamashita<sup>1</sup>, Joshua I. Warrick<sup>1</sup>, Xue-Ru Wu<sup>2</sup>, Jay D. Raman<sup>3</sup>, David J. DeGraff<sup>1,3,4,\*</sup>

<sup>1</sup>Department of Pathology and Laboratory Medicine, The Pennsylvania State University, College of Medicine, Hershey, PA

<sup>2</sup>Departments of Urology and Pathology, New York University School of Medicine and Veterans Affairs New York Harbor Healthcare System, Manhattan Campus, New York, NY

<sup>3</sup>Department of Surgery, Division of Urology, The Pennsylvania State University, College of Medicine, Hershey, PA

<sup>4</sup>Department of Biochemistry and Molecular Biology, The Pennsylvania State University, College of Medicine, Hershey, PA

<sup>†</sup>These authors contributed equally

### Supplemental Data

**Supplemental Figure 1: Impact of *Upk2*-Cre induced *Foxa1* KO on urothelial thickness in homozygous *HRAS*\* mice.** Bladder tissue dissected from 6 month old mice expressing two copies of mutant *HRAS* (*Upk2-HRAS\*\**) and (A) wild-type *Foxa1* (*Upk2-Cre/Upk2-HRAS\*\**), (B) heterozygous knockout of *Foxa1* (*Upk2-Cre/Upk2-HRAS\*\*/Foxa1<sup>loxp</sup>*); and (C) homozygous knockout of *Foxa1* (*Upk2-Cre/Upk2-HRAS\*\*/Foxa1<sup>loxp/loxp</sup>*). (D) Shows quantification of urothelial thickness in control and experimental mice. While urothelium measured in mice expressing two copies of *Upk2-HRAS*\* alone and in combination with heterozygous knockout of *Foxa1* was significantly thicker than control tissue (p=0.0004 and p=0.02; Kruskal-Wallis H test; Dunn's test for multiple comparisons), homozygous *Foxa1* knockout resulted in urothelium that was not significantly thicker than control mice (P = 0.45; Kruskal-Wallis H test, Dunn's test for multiple comparisons).

**Supplemental Figure 2: Films from *HRAS* and FOXA1 Western blotting.**

**Supplemental Figure 3: Films from Pan Cytokeratin Western blotting.**

**Supplemental Figure 4: Films from E-Cadherin Western blotting.**

# Supplemental Figure 1

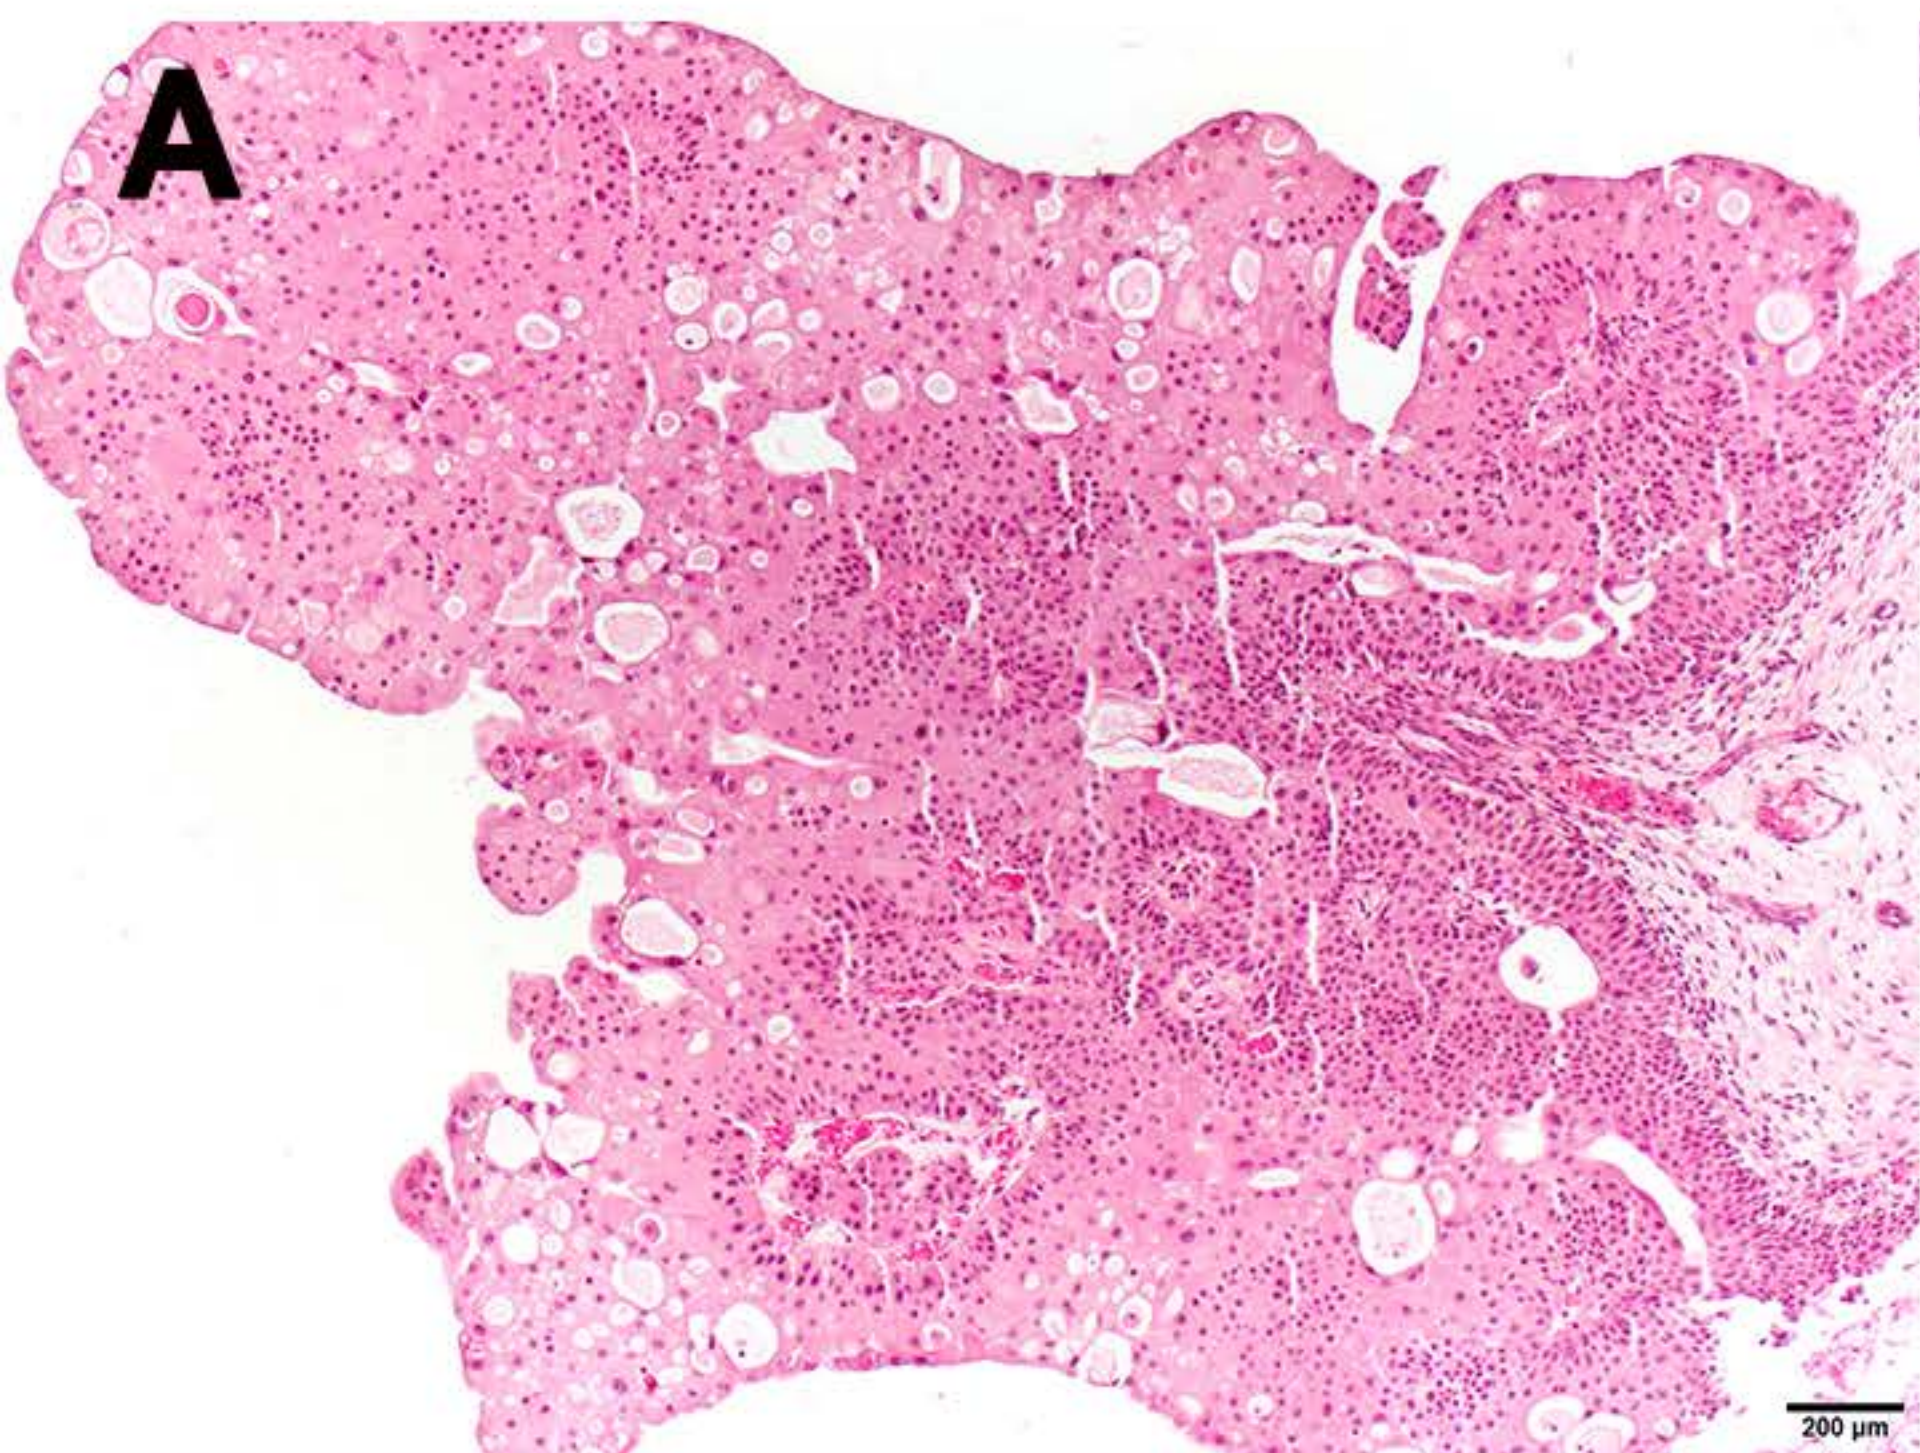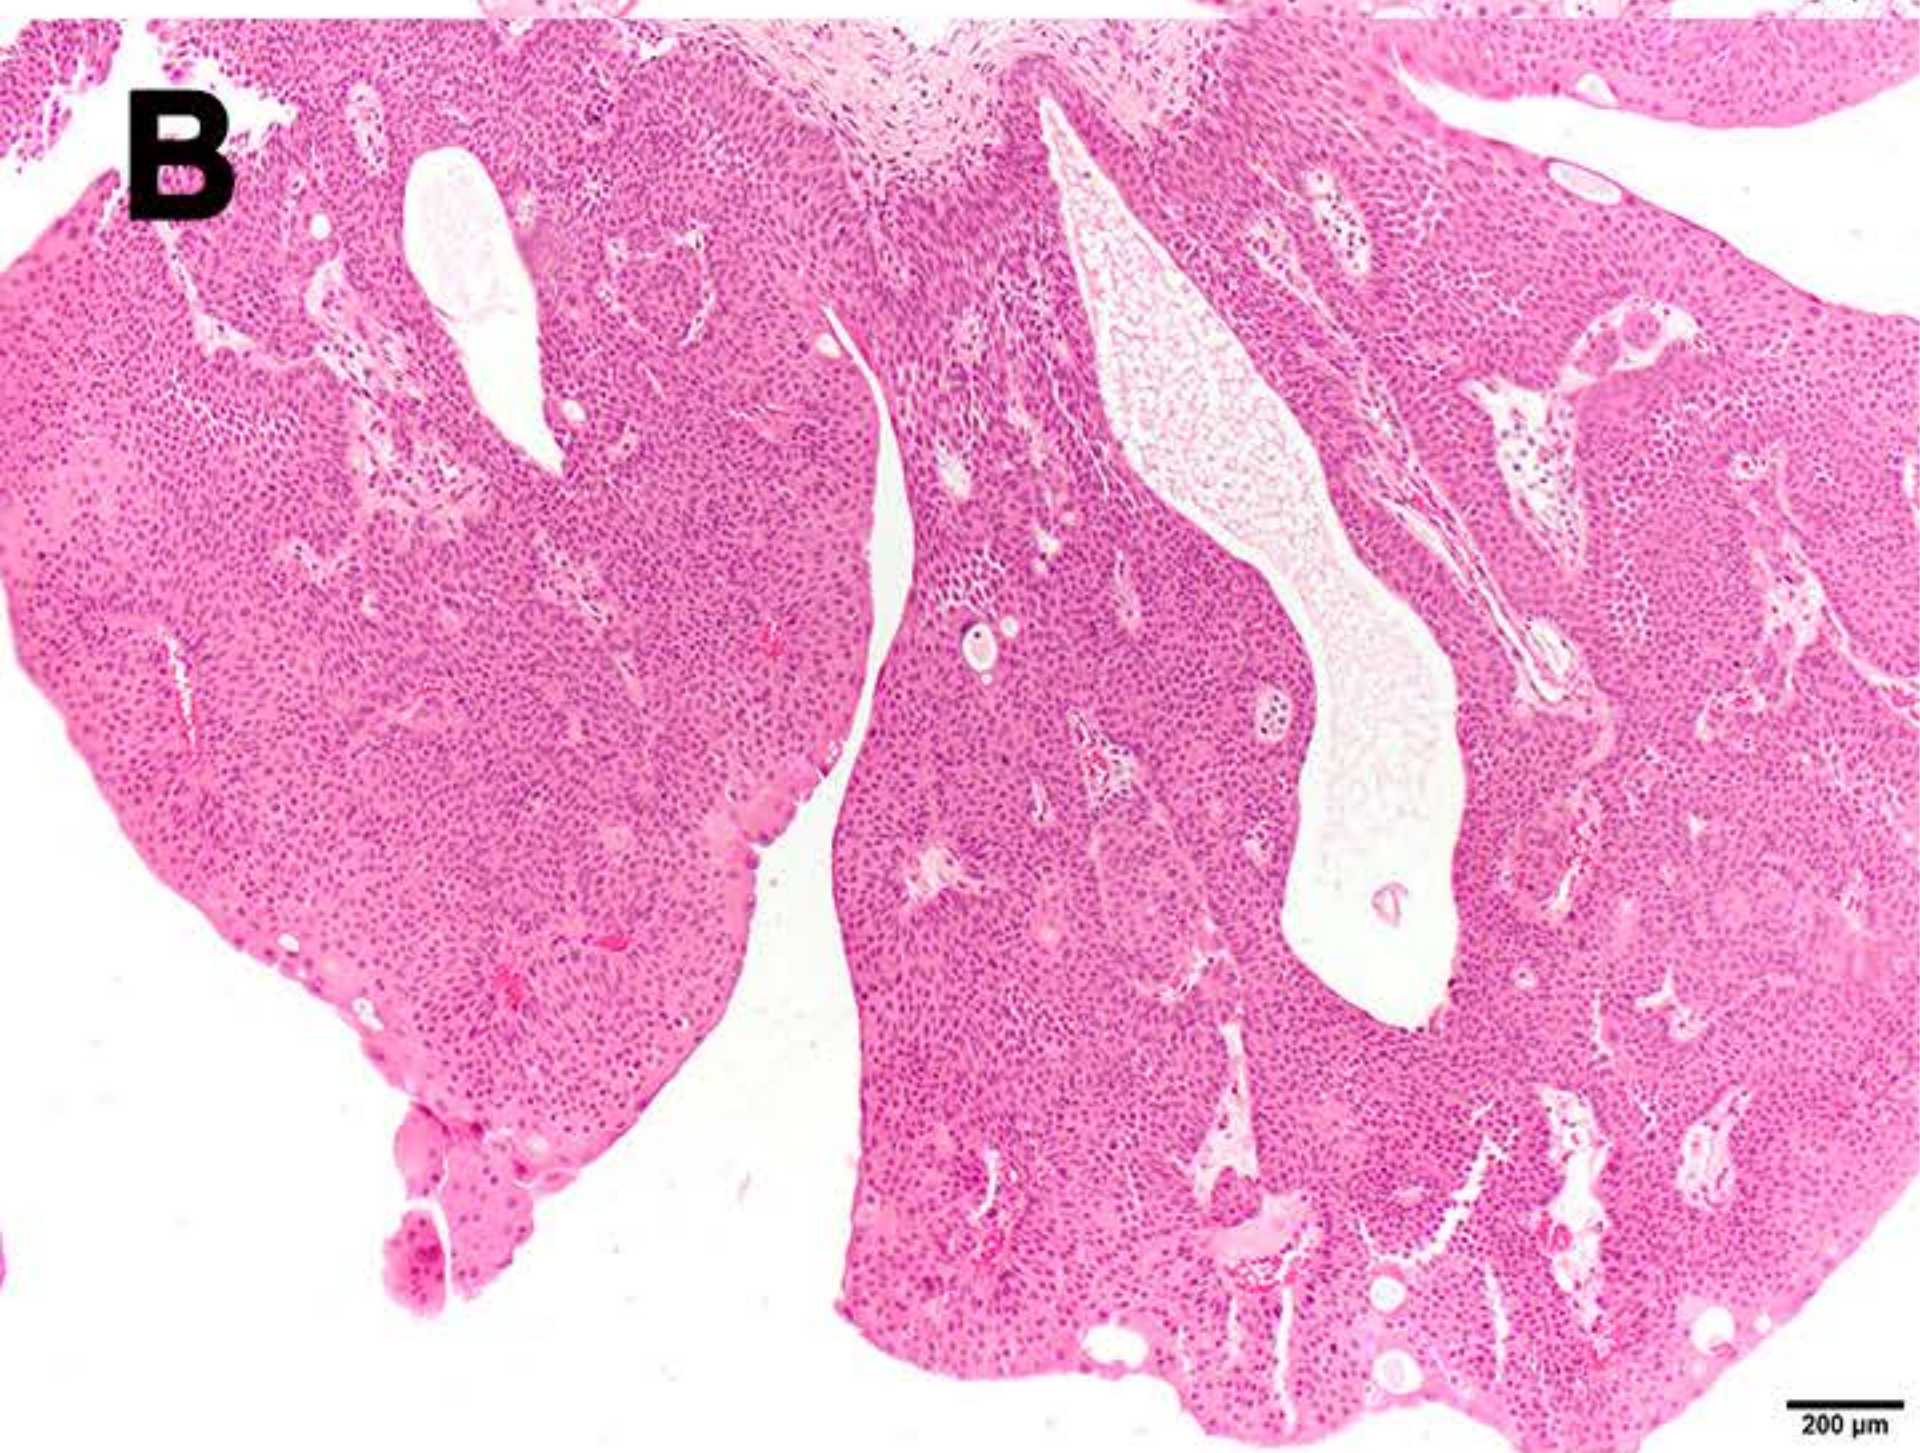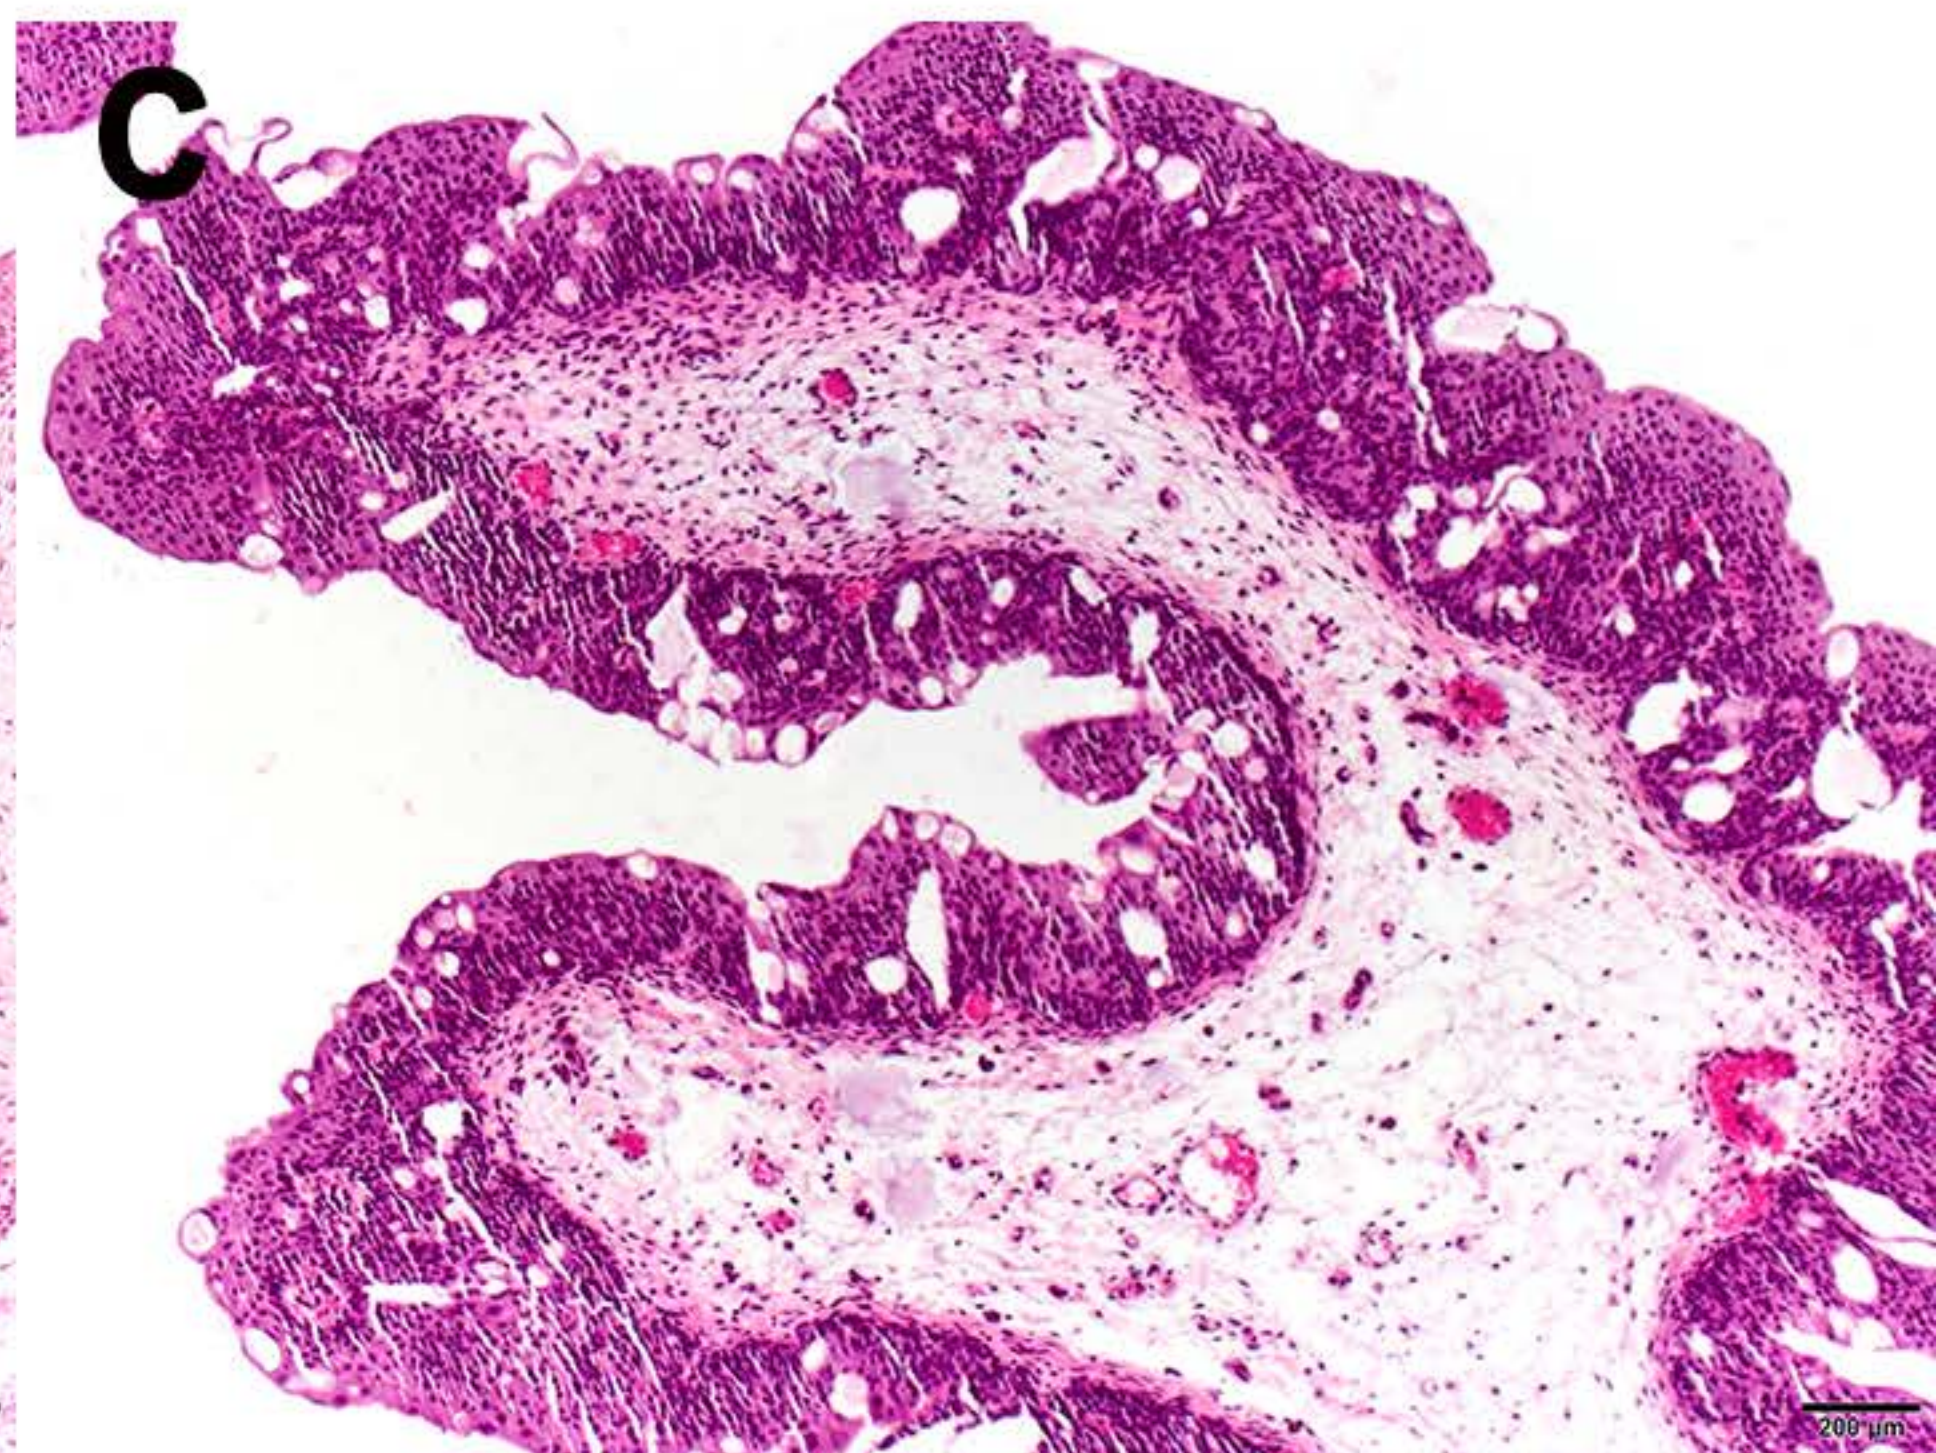

## **D** *Upk2-HRAS\* x2 copies*

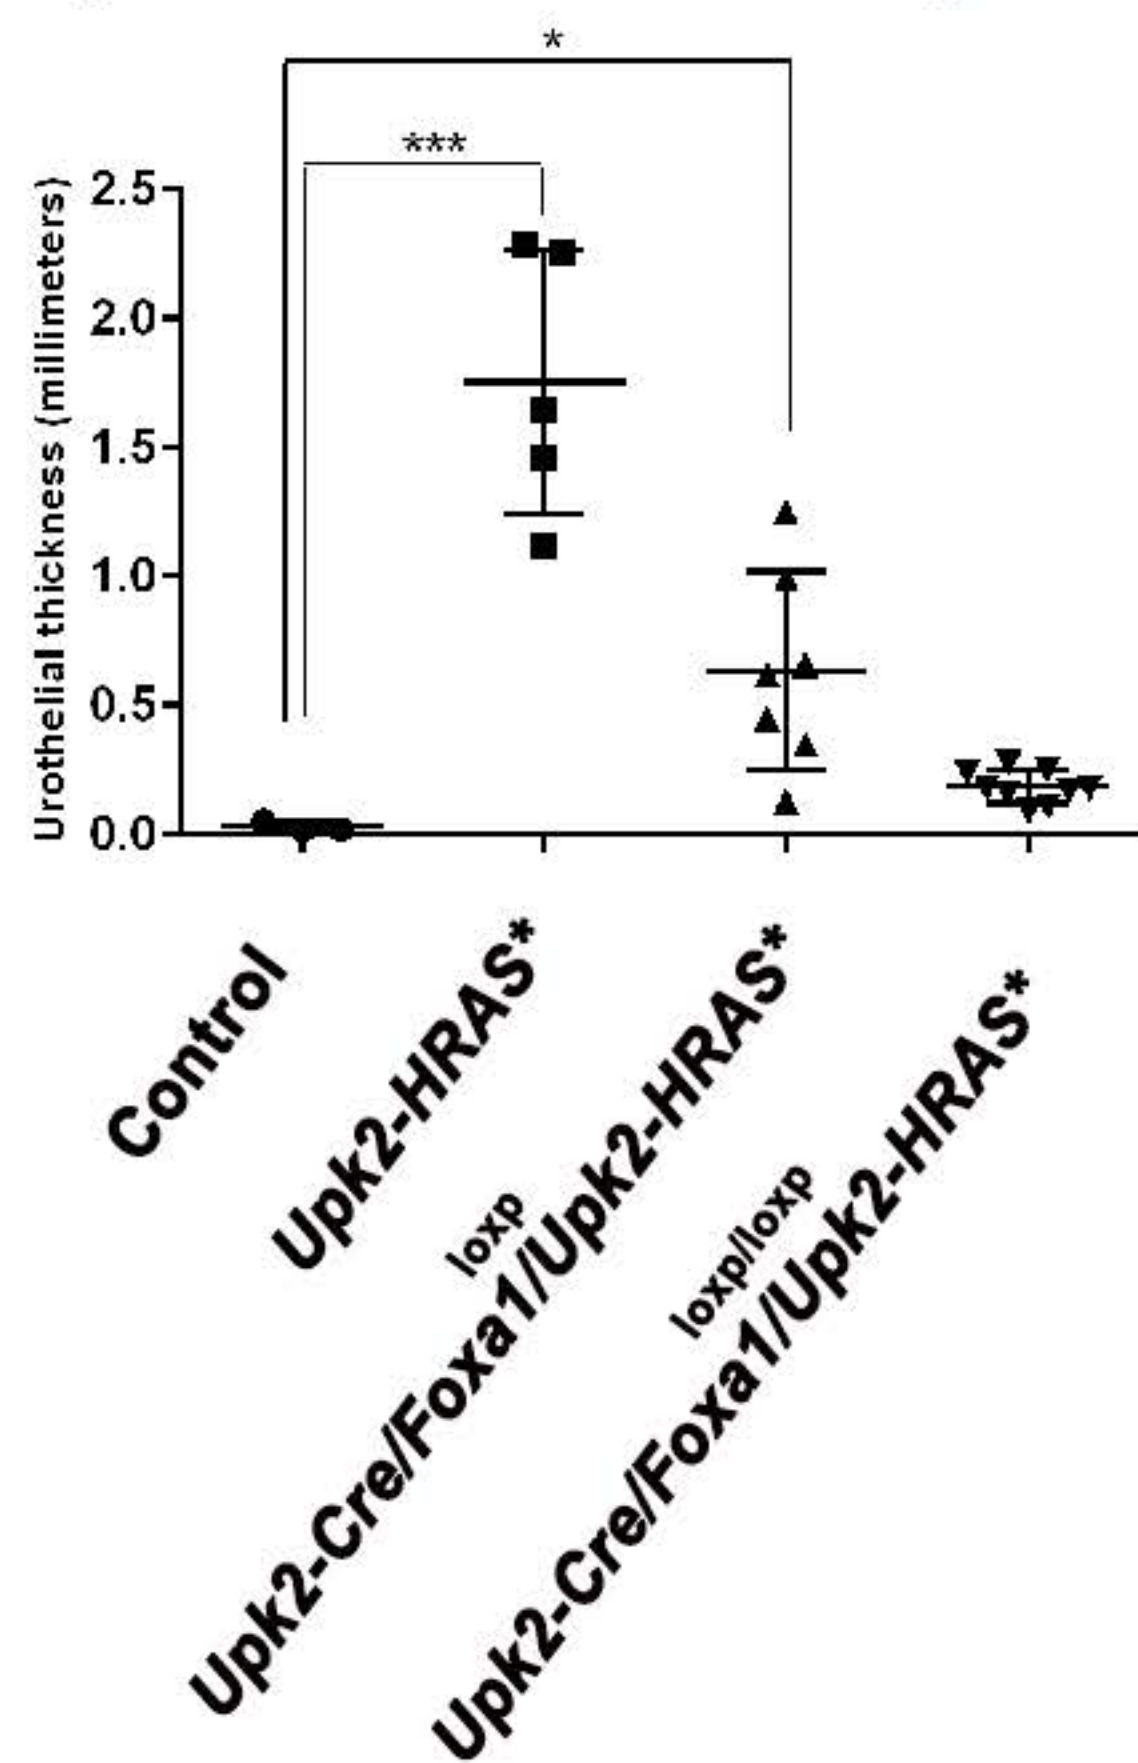

# Supplemental Figure 2

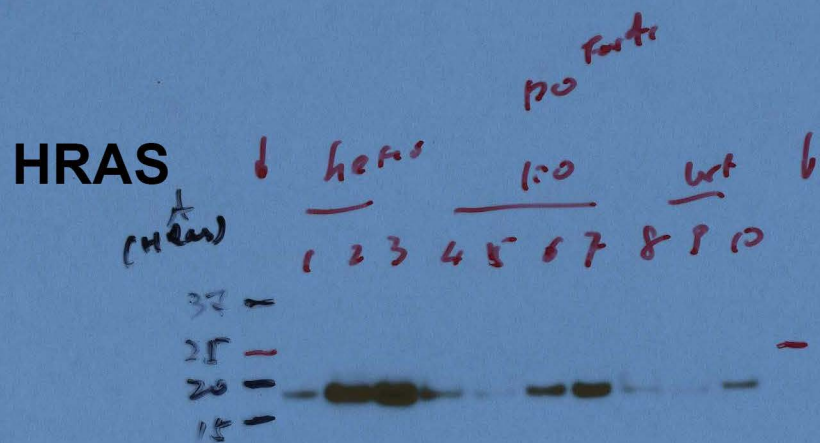

# FOXA1

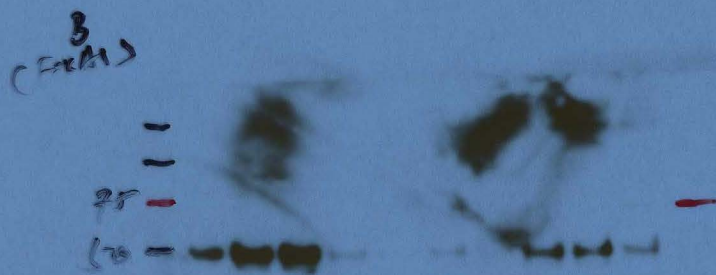

protein conc. tested  
by Act

protein conc. tested by  
appendix

# Supplemental Figure 3

Pan cytokeratin

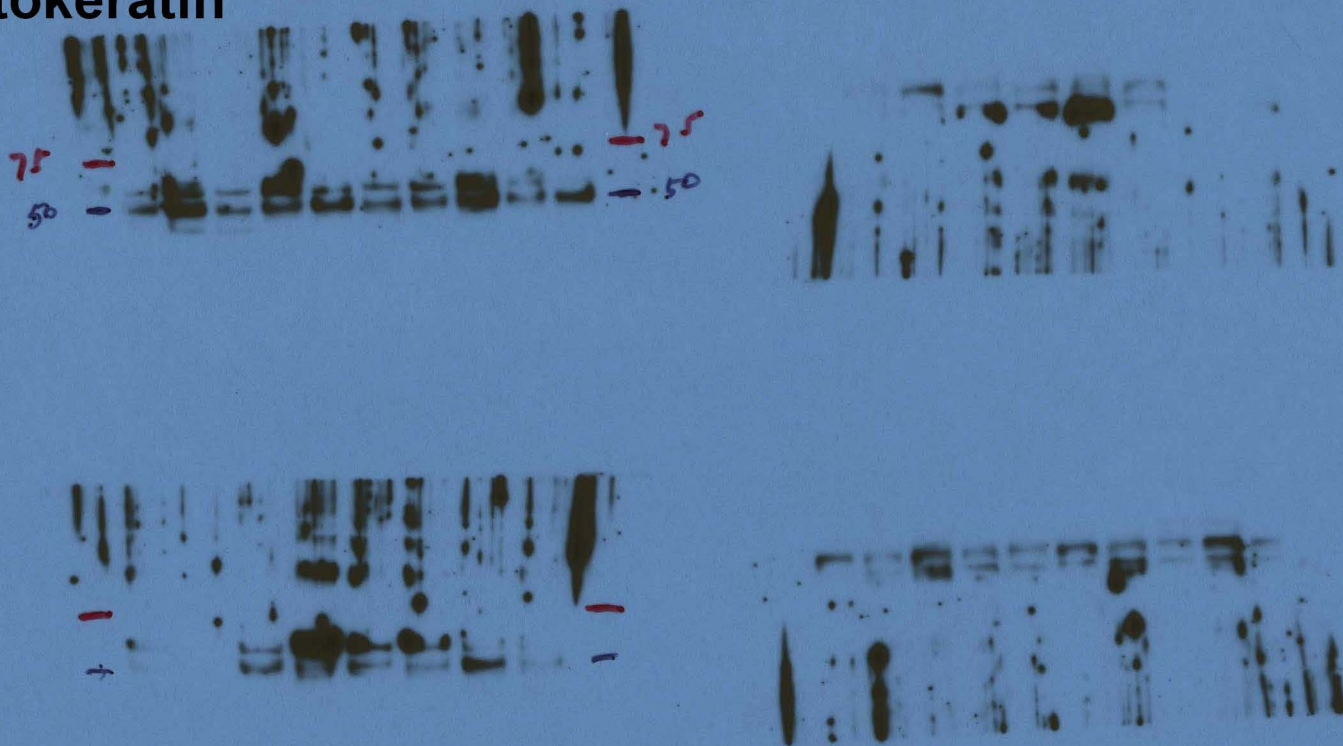

# Supplemental Figure 4

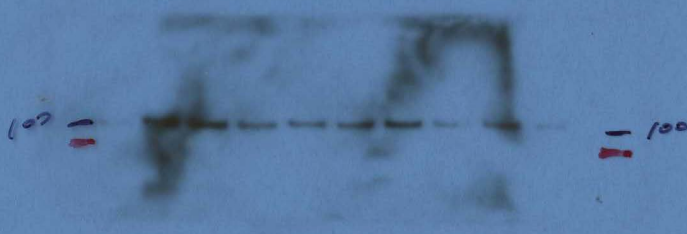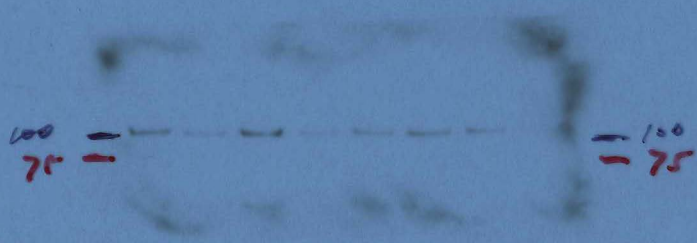

Supplement: 41598_2018_36720_MOESM1_ESM.pdf [file 41598_2018_36720_MOESM1_ESM.pdf]
